# Supplementary material for: Synthesis of high molecular weight poly(ricinoleic acid) via direct solution polycondensation in hydrophobic ionic liquids
Source: Royal Society of Chemistry journal article supplement (doi:10.1039/d4su00185k), 2024-01-01
Supplement: d4su00185k1.pdf [file d4su00185k1.pdf]

# **Synthesis of high molecular weight poly(ricinoleic acid) *via* a direct solution polycondensation in ionic liquids**

Lulu Wang<sup>#</sup>, Hua Yuan<sup>#</sup>, Xiaoli Ma, Zijin Li, Haowei Sun, Xiaoyan Zhang, Xiaoyu Huang, Qiaohong Peng\*, Yeqiang Tan\*

State Key Laboratory of Bio-Fibers and Eco-Textiles, School of Materials Science and Engineering, Qingdao University, Qingdao, Shangdong, 266071, China.

<sup>#</sup> These authors contributed equally to this work.

\*Corresponding authors' E-mail addresses: [pengqh@qdu.edu.cn](mailto:pengqh@qdu.edu.cn) (Qiaohong Peng);  
[tanyeqiang@qdu.edu.cn](mailto:tanyeqiang@qdu.edu.cn) (Yeqiang Tan)

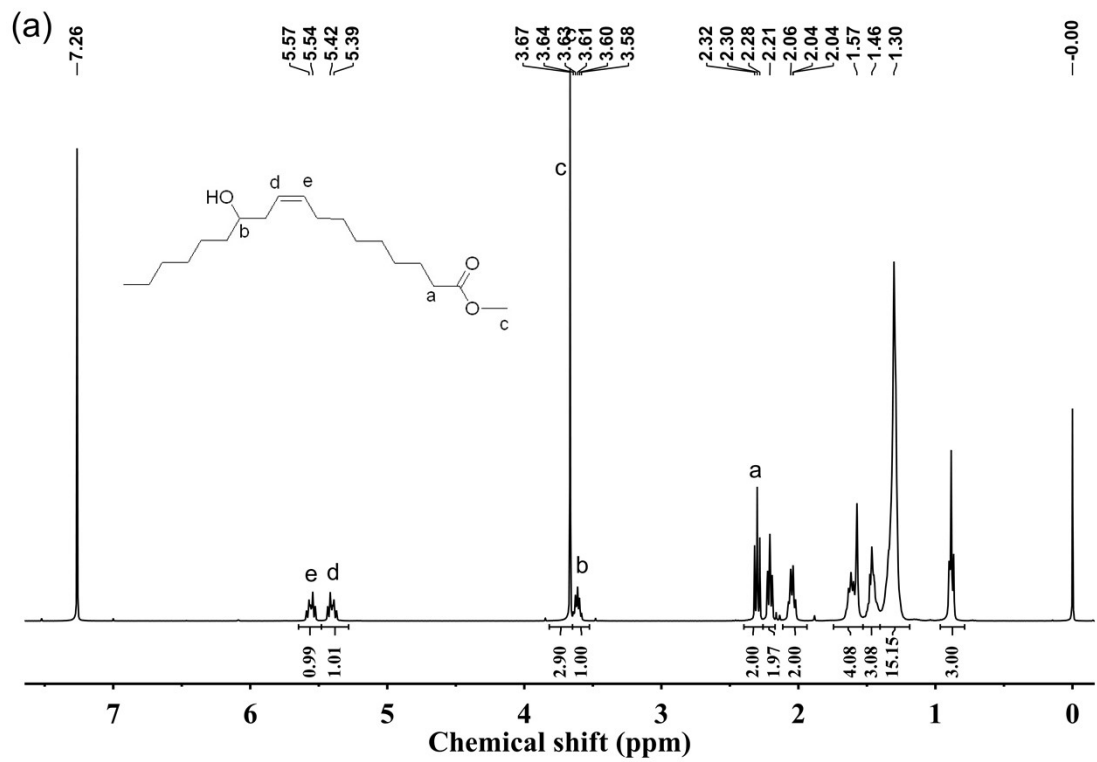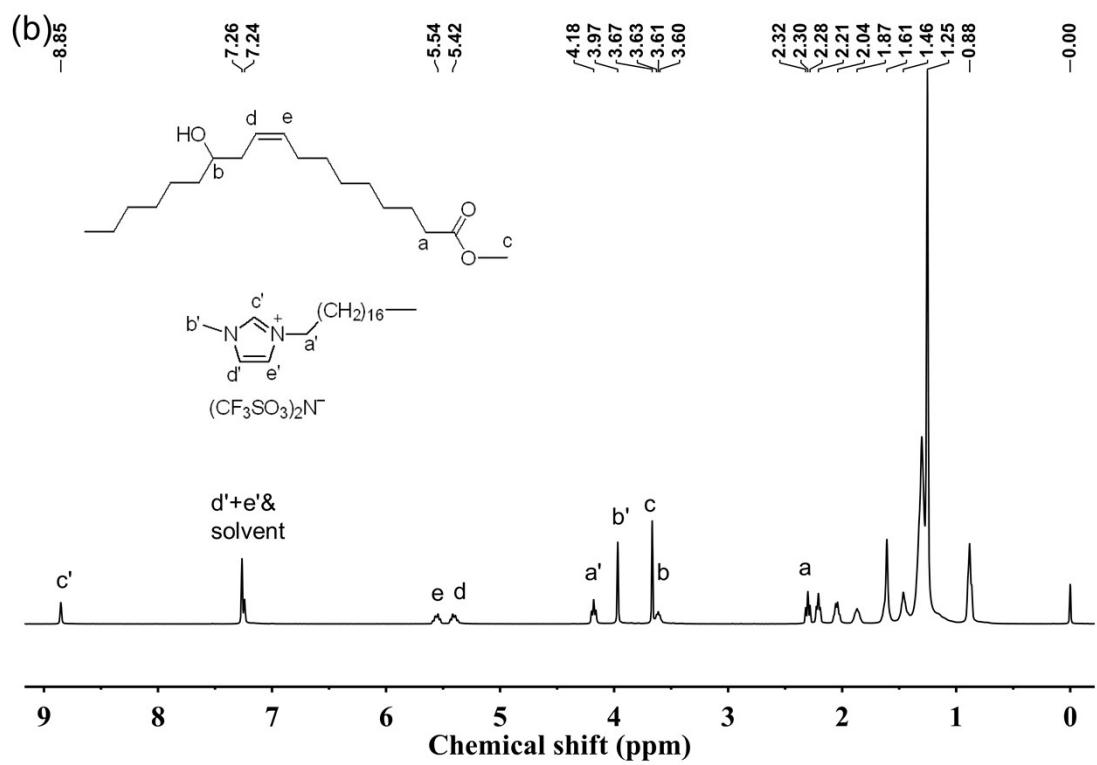

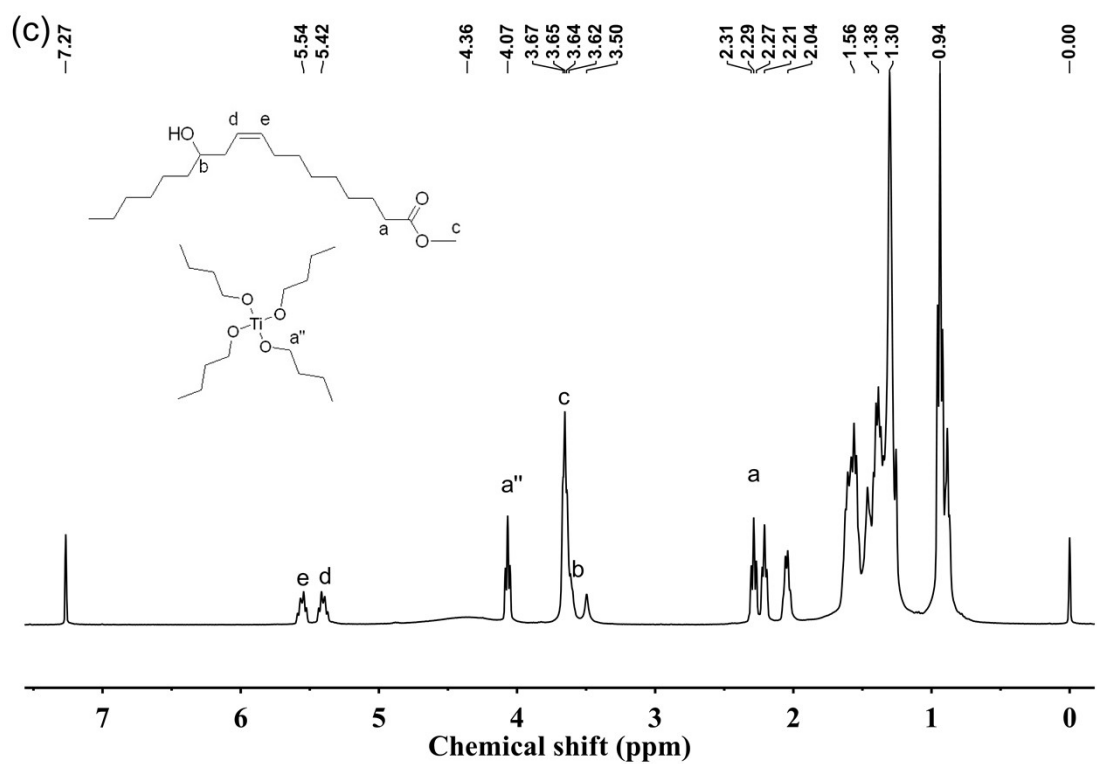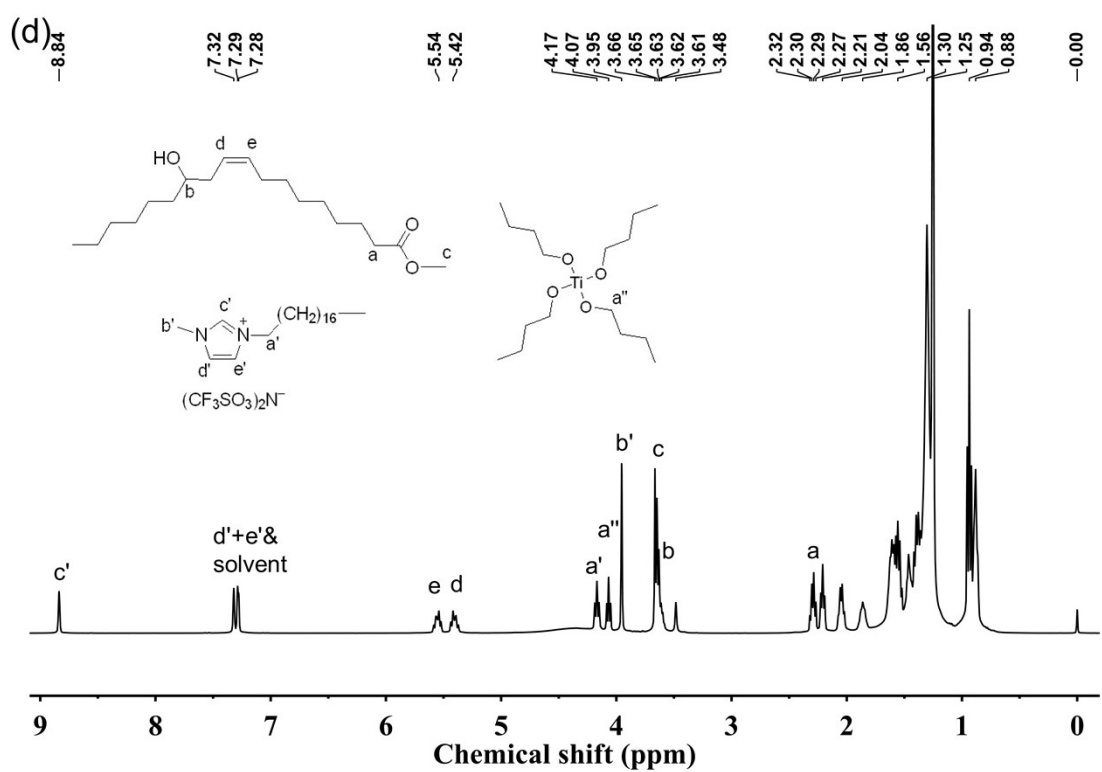

Figure S1  $^1\text{H}$  NMR spectrum of pure MR, MR+IL (1:1 in mole), MR+TBT (1:1 in mole), and MR +IL+TBT (1:1:1 in mole) ( $\text{CDCl}_3$ , 400 MHz).

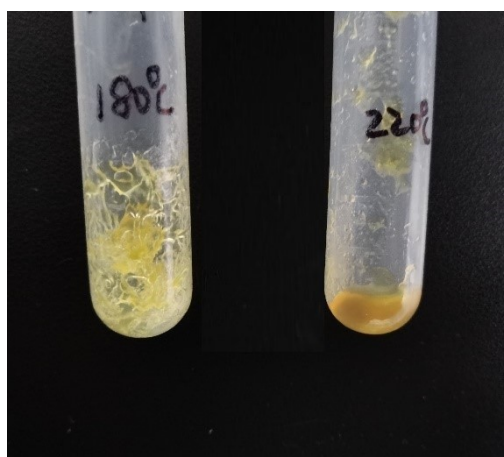

**Figure S2. The color contrast of the PRA obtained at different temperatures.**

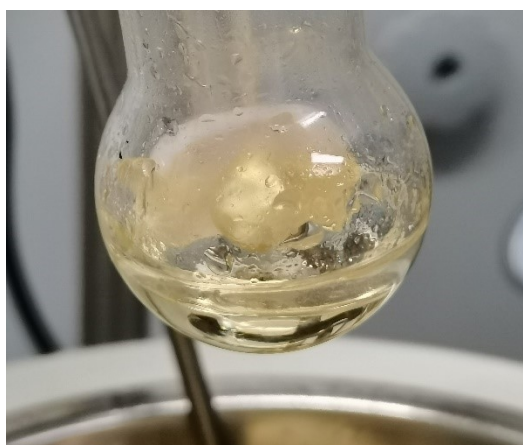

**Figure S3. Phase separation between ionic liquid and PRA after polymerization for 20 h.**

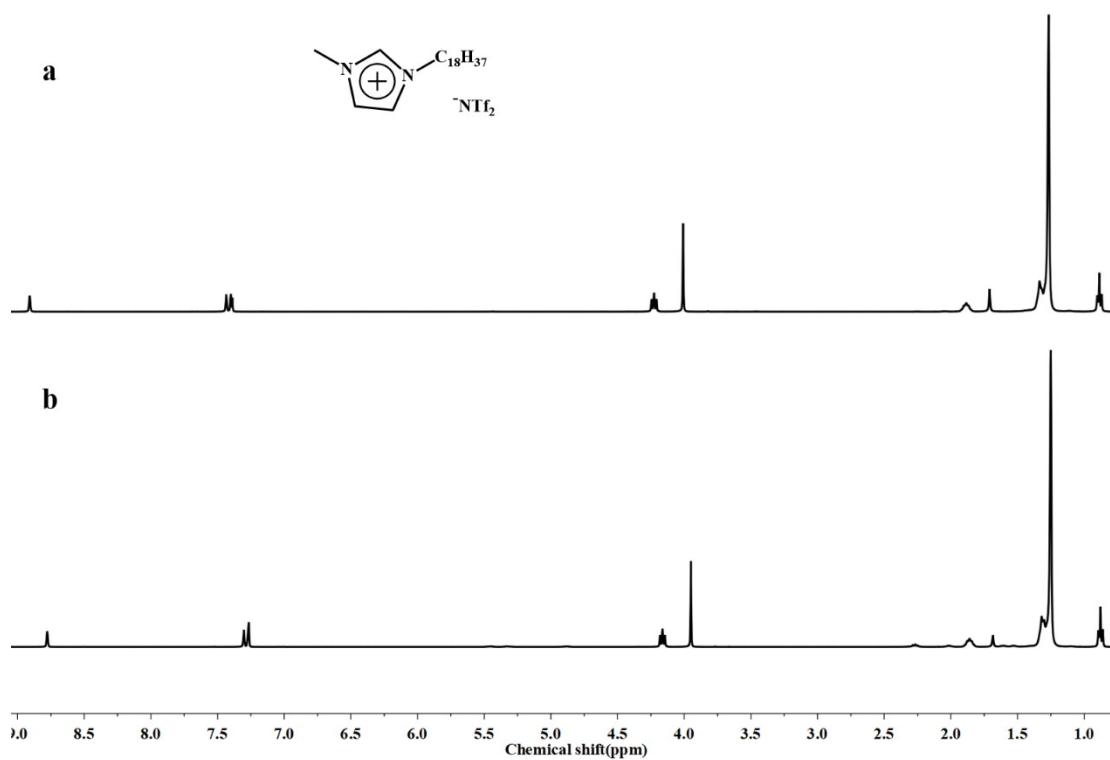

Figure S4.  $^1\text{H}$  NMR spectra of fresh (a) and recovered (b) [Odmim][NTf<sub>2</sub>].

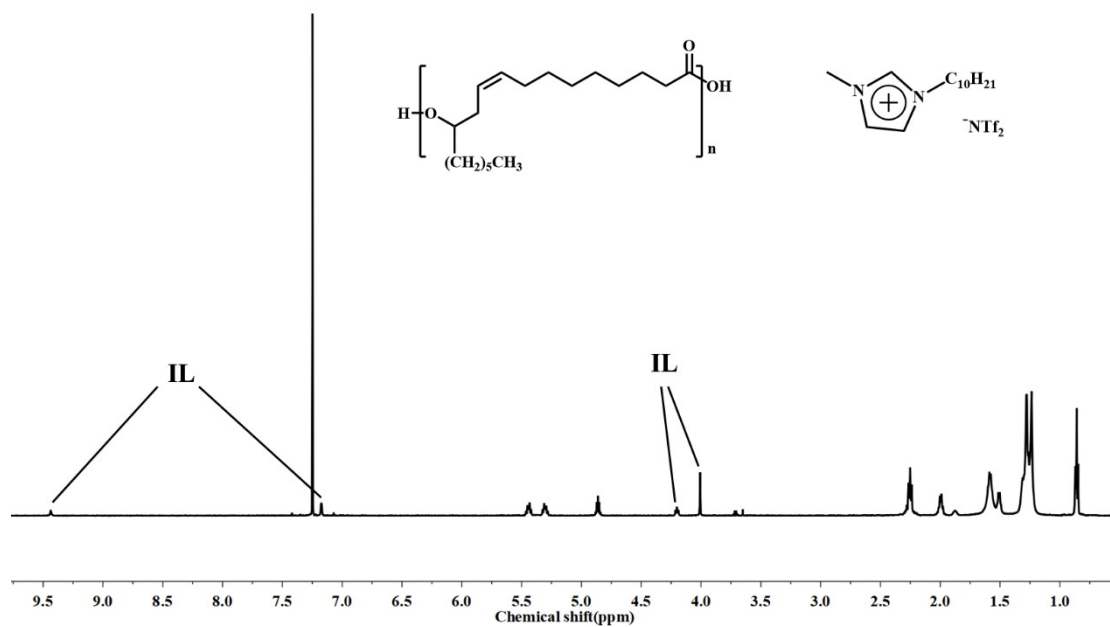

Figure S5.  $^1\text{H}$  NMR spectrum of the polymerization mixture of PRA and [Odmim][NTf<sub>2</sub>] after polymerization for 72 h at 180 °C.

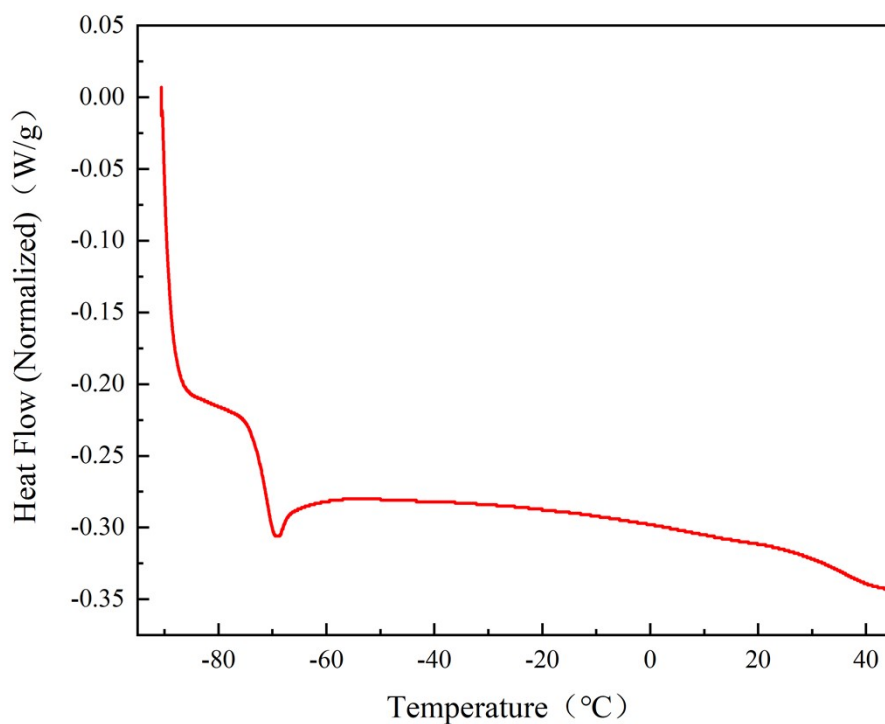

**Figure S6. DSC curve of PRA ( $M_w = 122$  kDa, polymerization conditions: MR: [OdMIM][NTf<sub>2</sub>] = 4:1 in mole, 1 wt% TBT as the catalyst, 180°C, 72 h)**

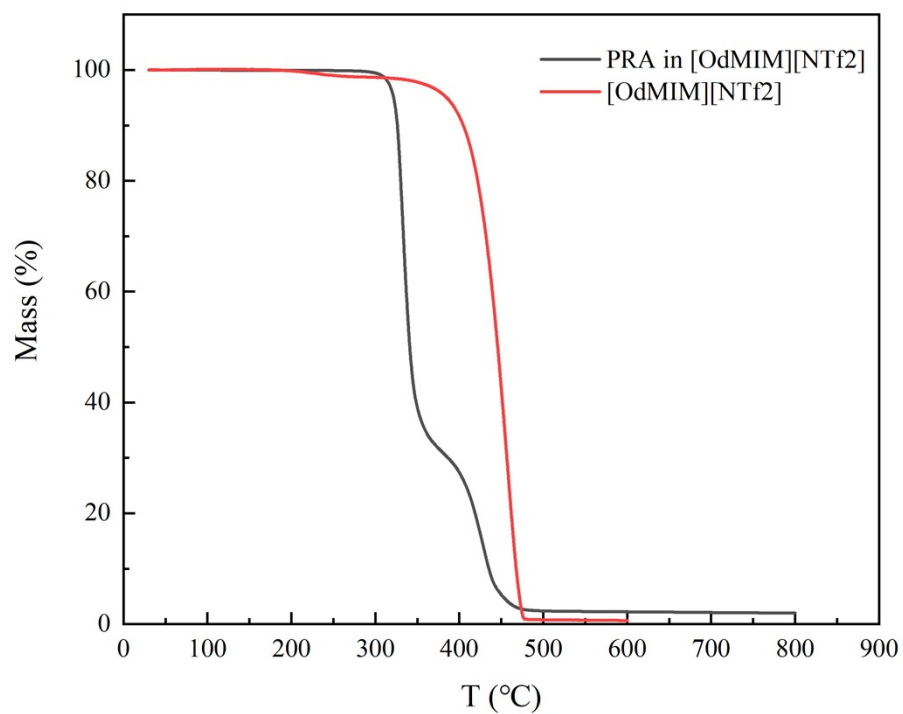

**Figure S7. Thermogravimetric curves of the pure [OdMIM][NTf<sub>2</sub>] (red line) and the polymerization mixture (black line) (Polymerization conditions: MR: [OdMIM][NTf<sub>2</sub>] = 4:1 in mole, 1 wt% TBT as the catalyst, 180°C, 72 h)**
